# Supplementary material for: Association of DOCK8, IL17RA, and KLK12 Polymorphisms with Atopic Dermatitis in Koreans
Source: PubMed Central journal article supplement — Ann Dermatol. 2020 Apr 24;32(3):197–205. doi: 10.5021/ad.2020.32.3.197 (PMC7992614; doi:10.5021/ad.2020.32.3.197), 2020-04-24
Supplement: ad-32-197-s002.pdf [file ad-32-197-s002.pdf]

**Supplementary Table 1.** The filtered WES variants for 40 AD cases vs. 43 KPGP control individuals

| Filter system | Model analysis    |          |           |                 |
|---------------|-------------------|----------|-----------|-----------------|
|               | Filter process    | Dominant | Recessive | Compound hetero |
| Filter step   |                   |          |           |                 |
| Filter 1      | Raw               | 249,173  | 250,479   | 289,575         |
| Filter 2      | EFFECT            | 33,933   | 34,282    | 40,964          |
| Filter 3      | SIFT, Polyphen2   | 15,445   | 15,667    | 19,628          |
| Filter 4      | PhyloP, PhastCons | 11,020   | 11,243    | 14,371          |
| Filter 5      | 1000 Genome       | 7,446    | 7,639     | 10,710          |
| Filter 6      | Korean            | 6,813    | 7,006     | 10,702          |

Values are presented as number. WES: whole-exome sequencing, AD: atopic dermatitis, KPGP: Korean Personal Genome Project.
