# Supplementary material for: Association of DOCK8, IL17RA, and KLK12 Polymorphisms with Atopic Dermatitis in Koreans
Source: PubMed Central journal article supplement — Ann Dermatol. 2020 Apr 24;32(3):197–205. doi: 10.5021/ad.2020.32.3.197 (PMC7992614; doi:10.5021/ad.2020.32.3.197), 2020-04-24
Supplement: ad-32-197-s003.pdf [file ad-32-197-s003.pdf]

**Supplementary Table 2.** Minor allele frequency of *DOCK8*, *IL17RA*, and *KLK12* polymorphisms in 1000 genome project and Sanger sequencing data

| Variable                   | 1000 genome project |            |        | Sanger sequencing |          |          |
|----------------------------|---------------------|------------|--------|-------------------|----------|----------|
|                            | Global              | East Asian | Korean | Healthy control   | AD cases | AM cases |
| <i>DOCK8</i> (rs529208)    |                     |            |        |                   |          |          |
| MAF                        | 0.529               | 0.721      | 0.746  | 0.72              | 0.72     | 0.73     |
| Population (n)             | 1,000               | 286        | 800    | 82                | 87       | 72       |
| <i>IL17RA</i> (rs12484684) |                     |            |        |                   |          |          |
| MAF                        | 0.113               | 0.298      | 0.337  | 0.26              | 0.36     | 0.31     |
| Population (n)             | 1,000               | 286        | 800    | 82                | 87       | 72       |
| <i>KLK12</i> (rs3745540)   |                     |            |        |                   |          |          |
| MAF                        | 0.534               | 0.637      | 0.655  | 0.62              | 0.70     | 0.60     |
| Population (n)             | 1,000               | 286        | 800    | 82                | 87       | 72       |

AD: atopic dermatitis, AM: atopic march, MAF: minor allele frequencies.
