# Supplementary figures and images for: Association of DOCK8, IL17RA, and KLK12 Polymorphisms with Atopic Dermatitis in Koreans
Source: PubMed Central journal article supplement — Ann Dermatol. 2020 Apr 24;32(3):197–205. doi: 10.5021/ad.2020.32.3.197 (PMC7992614; doi:10.5021/ad.2020.32.3.197), 2020-04-24

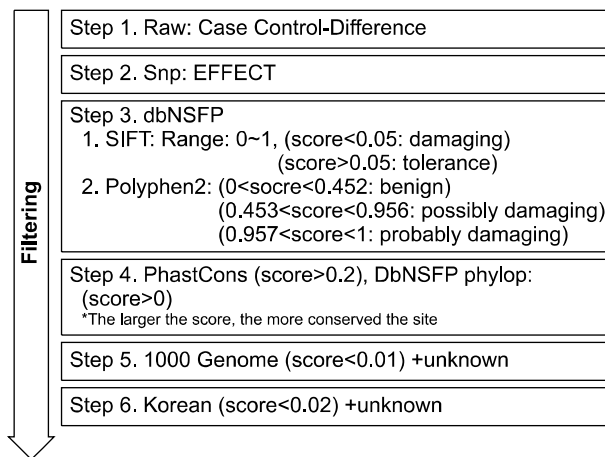

**Supplementary Fig. 1.** Flow chart of the process for filtering variants.

Supplement: ad-32-197-s001.pdf [file ad-32-197-s001.pdf]
